# Supplementary material for: Genome-wide identification of ZmHMAs and association of natural variation in ZmHMA2 and ZmHMA3 with leaf cadmium accumulation in maize
Source: PeerJ. 2019 Oct 23;7:e7877. doi: 10.7717/peerj.7877 (PMC6815194; doi:10.7717/peerj.7877)
Supplement: Table S1 [file peerj-07-7877-s001.xlsx]

## Sheet: Table S1
Table S1| Expression level of ZmHMAs in different tissues and stages of maize plants growing under non-limiting growth conditions
Tissue	GRMZM2G067853_T02	GRMZM2G099191_T01	GRMZM2G175576_T02	GRMZM2G455491_T01	GRMZM2G144083_T01	GRMZM2G315931_T01	GRMZM2G029951_T01	GRMZM5G855347_T01	GRMZM2G404702_T01	GRMZM2G143512_T01	GRMZM2G010152_T01	GRMZM2G151406_T01
Primary_Root_3DAS	1.67	211.51	22.78	0	66.06	40.12	29.31	20.61	39.39	39.94	109.82	104.63
Root_MZ_and_EZ_3DAS	2.7	26.6	0.18	0	0.87	45.77	13.94	21.81	21.7	3.54	63.43	50.08
Root_DZ_3DAS	0.15	163.39	33.26	0	95.9	29.19	44.61	17.02	32.38	48.35	111.08	157.98
Root_CP_3DAS	2.62	122.86	34.44	0	1.88	42.99	43.82	51.59	30.85	4.45	191.28	99.24
Root_Stele_3DAS	0.22	754.98	18.19	0	222.91	51.61	45.07	16.18	90.25	176.22	127.42	250.45
Primary_Root_GH_6DAS	0.87	158.25	10.69	0	124.26	49.15	52.73	45.43	25.02	49.85	89.92	64.47
Root_System_7DAS	1.31	228.1	91.73	0	110.31	50.75	83.74	16.67	39.29	45.94	90.16	128.98
Primary_Root_7DAS	0.34	372.58	95.92	0	124.29	61.12	81.53	50.55	41.04	53.11	92.89	141.97
Seminal_Roots_7DAS	0.47	238.49	65.99	0	111.94	55.9	85.52	24.01	41.23	47.93	81.62	112.97
Primary_Root_Z1_7DAS	0.42	44.07	5.79	0	6.23	44.08	23.02	28.98	25.79	9.21	60.07	71.48
Primary_Root_Z2_7DAS	0.39	226.24	66.69	0	167.9	51.32	110.92	12.14	33.59	58.5	77.45	86.13
Primary_Root_Z3_7DAS	0.18	280.13	73.77	0	120.77	44.35	82.48	17.83	36.83	52.15	91.81	110.94
Primary_Root_Z4_7DAS	0.74	357.15	187.56	0	132.23	47.54	83.12	27.07	44.1	59.71	104.46	152.59
Crown_Roots_Nodes1-3_V7	0.12	753.61	71.46	0	200.5	36.06	247.87	22.28	13.59	74.34	71.83	63.96
Crown_Roots_Node4_V7	0.15	650.75	65.91	0	203.03	43.61	334.68	19.46	19.23	55.05	81.36	73.78
Crown_Roots_Node5_V7	0.14	308.18	22.38	0	69.26	34.97	233.31	36.2	14.49	21.68	67.75	94.11
Crown_Roots_Node5_V13	0.1	409.13	34.07	0	46.75	46.57	222.22	35.21	30.7	21.1	94.87	120.09
Brace_Roots_Node6_V13	0.2	157.6	0.52	0	0.29	68.11	23.58	28	8.85	2.53	57.34	28.42
Coleoptile_GH_6DAS	0.22	96.45	0.65	0	16.82	88.48	51.36	55.89	16.65	19.33	52.39	34.83
Pooled_Leaves_V1	2.66	169.8	13.45	0	69.37	289.84	31.12	133.37	22.17	81.2	53.5	51.92
Topmost_Leaf_V3	0.47	93.3	2.62	0	25.12	268.03	31.91	49.26	25.9	30.68	53.98	66.2
Shoot_Tip_V5	0.23	172.42	0.32	0	22.55	71.89	44.95	11.59	7.87	13.27	23.74	25.25
Tip_Stage2_Leaf_V5	3.73	107.33	5.58	0	22.47	264.43	69.49	80.19	2.79	24.91	59.02	9.93
Base_Stage2_Leaf_V5	1.43	65.78	1.8	0	9.54	190.27	26.27	19.62	14.29	18.47	33.4	28.67
Tip_Stage2_Leaf_V7	3.17	75.91	5.24	0	35.37	273.26	61.3	160.18	4.81	20.4	68.36	12.02
Base_Stage2_Leaf_V7	1.95	55.94	0	0	6.94	146.19	36.87	17.3	3.94	10.03	29.3	9.09
Eighth_Leaf_V9	1.27	151.54	33.5	0	24.76	91.75	61.85	94.74	8.27	28.23	66.52	25.75
Eleventh_Leaf_V9	2.68	109.97	26.51	0	46.39	155.28	46.17	28.64	19.41	40.3	66.77	52.67
Thirteenth_Leaf_V9	5.37	120.38	22.93	0	65.31	151.57	60.45	48.11	33.29	46.25	59.23	106.81
Immature_Leaves_V9	2.32	48.93	8.26	1.04	36.03	137.59	39.69	14.39	37.11	40.49	53.09	123.51
Thirteenth_Leaf_VT	1.88	229.48	49.87	0	18.08	134.1	40.51	183.39	7.68	41.9	62.64	22.05
Thirteenth_Leaf_R2	23.4	238.73	44.16	0	21.31	143.11	53.84	102.51	3.26	33.22	64.25	21.8
Leaf_0DAP	3.72	137.92	27.39	0	8.46	155.49	52.24	132.96	8.95	26.67	59.42	28.96
Leaf_6DAP	2.12	155.84	57.84	0	23.38	124.3	42.52	98.04	11.73	27.11	68.08	35.78
Leaf_12DAP	0.86	216.58	34.17	0	15.45	181.27	63.19	75.9	9.01	21.69	58.47	29.17
Leaf_18DAP	3.08	160.46	45.27	0	10.08	149.83	46.26	69.47	9.87	30.04	59.74	36.93
Leaf_24DAP	3.55	125.04	29.11	0	11.97	197.23	64.01	49.64	14.9	16.25	63.91	72.04
Leaf_30DAP	1.51	231.32	64.58	0	24.25	245.36	73.7	52.83	27.78	33.93	77.64	81.32
Stem_and_SAM_V1	0.64	137.37	8.65	0	61.62	85.09	36.72	16.93	10.79	35.22	33.46	30.54
Stem_and_SAM_V3	1.91	149.38	4.62	0	74.12	64.04	36.63	21.11	12	24.24	30.28	36.23
First_Internode_V5	0.58	277.68	1.56	0	63.32	58.58	43.87	26.03	18.48	29.65	32.92	45.79
Fourth_Internode_V9	1.12	52.94	0	0	8	86.84	43.51	36.5	6.51	9.44	25.98	14.44
Internode_0DAP	0.41	894.03	13.32	0	157.02	63.62	48.8	33.44	28.1	37.68	96.29	89.04
Internode_6DAP	1.79	522.74	32.18	0	67.67	62.33	37.05	95.91	18.34	23.84	105.19	60.82
Internode_12DAP	0.92	500.67	19.77	0	25.11	67.27	41.71	60.66	13.56	15.66	63.52	44.83
Internode_18DAP	1.22	471.65	25.93	0	18.9	66.3	47.22	61.49	8.8	18.17	80.04	50.28
Internode_24DAP	3.31	623.01	29.47	0	30.33	81.99	44.74	79.13	14.02	14.36	50.68	49.21
Internode_30DAP	2.39	349.19	33.98	0	24.31	72.27	38.75	56.57	12.15	15.77	65.98	47.02
Immature_Tassel_V13	2.04	112.66	0.59	0	0.62	129.81	62.43	47.44	6.19	3.15	32.18	13.66
Meiotic_Tassel_V18	0.75	207.31	8.52	0	9.49	120	65.34	42.85	30.39	47.06	96.72	68.71
Anthers_R1	0.38	176.72	12.7	627.01	2.29	73.97	136.34	42.09	11.46	25.11	150.45	32.74
Immature_Cob_V18	2.19	85.31	0	0	0.42	114.29	64.45	40.72	5.24	3.66	26.42	13.72
Pre-pollination_Cob_R1	1.03	124.43	2.04	0	4.79	90.23	43.87	47.73	4.74	12.28	33.75	10.86
Silks_R1	0.09	264.32	0	0	3	103.16	36.74	76.63	5.88	13.3	51.98	12.27
Whole_Seed_2DAP	1.57	175.14	5.39	0	3.71	75.56	40.04	44.35	3.39	13.13	36.03	11.73
Whole_Seed_4DAP	0.7	261.49	14.27	0	2.78	73.26	47.26	103.33	4.19	13.9	42.09	12.67
Whole_Seed_6DAP	0.56	401.67	17.12	0	2.75	61.15	42.2	53.56	5.28	18.05	53.45	12.09
Whole_Seed_8DAP	0.21	385.02	29.2	0	4.12	58.85	43.56	43.8	5.63	20.44	61.28	14.69
Whole_Seed_10DAP	1.75	367.99	25.06	0	9.99	69.22	54.87	38.38	8.19	29.14	82.09	27.51
Whole_Seed_12DAP	0.32	232.62	14.44	0	18.18	59.78	52.33	20.59	7.62	24.76	83.11	27.91
Whole_Seed_14DAP	0.44	208.45	7.58	0	19.93	47.11	74.46	15.93	11.99	33.42	46.89	34.46
Whole_Seed_16DAP	1.34	149.98	3.16	0	33.39	66.59	69.22	25.24	18.56	62.37	50.77	62.75
Whole_Seed_18DAP	3.98	186.22	7.86	0	68.43	55.26	57.32	15.95	18.54	75.91	47.36	52.93
Whole_Seed_20DAP	1.17	198.8	1.99	0	102.37	52.31	46.41	20.77	26.64	93.53	40.5	79.78
Whole_Seed_22DAP	0.84	222.71	3.15	0	129.57	64.23	50	18.38	27.03	103.05	46.68	81.92
Whole_Seed_24DAP	0.54	277.59	0.65	0	116.79	67.53	54.29	23.33	28.68	111.09	45.88	99.71
Endosperm_12DAP	2.71	180.15	0.8	0	21.44	64.74	76.95	30.36	6.82	18.03	54.36	24.26
Endosperm_14DAP	6	177.13	0	0	12.61	43.87	90.81	11.45	15.31	49.3	27.53	55.25
Endosperm_16DAP	4.88	50.48	0	0	40.47	48.37	50.52	7.28	19.07	87.01	15.97	90.97
Endosperm_18DAP	5.62	146.4	0	0	72.7	53.88	62.47	7.98	23.29	86.28	28.09	58.65
Endosperm_20DAP	4.33	266.14	0	0	225.54	46.31	40.1	11.85	28.16	157.85	24.24	138.54
Endosperm_22DAP	0.71	351.35	0	0	268.25	52.65	36.81	13.02	39.4	178.75	26.23	165.74
Endosperm_24DAP	4.37	439.92	0	0	281.72	59.02	40.5	13.95	44.69	175.62	29.45	180.57
Embryo_16DAP_R1	3.16	26.67	0	1.18	0	76.58	56.11	24.1	0.66	0	21.68	7.76
Embryo_18DAP	0.57	63.66	0	2.13	0	100.72	56.25	13.08	5.05	0	25.77	11.7
Embryo_20DAP	0.78	32.22	0	0	2.63	111.53	56.37	10.51	3.87	0.88	27.14	10.22
Embryo_22DAP	1.98	52.05	0	0	2.97	98.68	60.19	12.93	4.61	0.74	26.39	12.87
Embryo_24DAP	1.12	49.43	0	0.69	1.93	92.08	54.24	7.39	2.97	1.32	31.67	9.8
Pericarp_18DAP	1.24	243.93	12.56	0	19.88	65.1	37.14	67.27	15.21	27.07	79.45	51.41
