# Supplementary material for: Genome-wide identification of ZmHMAs and association of natural variation in ZmHMA2 and ZmHMA3 with leaf cadmium accumulation in maize
Source: PeerJ. 2019 Oct 23;7:e7877. doi: 10.7717/peerj.7877 (PMC6815194; doi:10.7717/peerj.7877)
Supplement: Table S2 [file peerj-07-7877-s002.xlsx]

## Sheet: Table S2
Table S2 | List of gene primers used for qRT-PCR assay, sequencing analyses and constructed vectors in the present study
Primer Name	Gene ID	Forward (5'---3')	Reverse (5'---3')
ZmHMA1_qRTPCR	GRMZM2G067853_T02	TGAACACTCCGACATGGTCC	GGTGTAGCTTGAGGGAGAGC
ZmHMA2_qRTPCR	GRMZM2G099191_T01	CGGTGAGATCGATGGGGAAG	GGCAACGTATCCGACGGTAA
ZmHMA3_qRTPCR	GRMZM2G175576_T02	TTAGGCTGTTTGGCTCAGGT	CCACAAACCAAACATGAAAGTGAG
ZmHMA5_qRTPCR	GRMZM2G144083_T01	CGTCGAGCTCTGTTCCTCTC	CAGGTCGCCGTTTCCTCC
ZmHMA6_qRTPCR	GRMZM2G315931_T01	GGGGAACGGTGATGGTGAC	CATTCCCCCAACGTCAAGGA
ZmHMA7_qRTPCR	GRMZM2G029951_T01	ATCTCCTGCGCTTCTTGTGC	CCTCTGGCCTGTACTGAACC
ZmHMA8_qRTPCR	GRMZM5G855347_T01	GGAGAGGTTGCAGCAGGAAA	CCAATGGTCCTCCCAATGCT
ZmHMA9_qRTPCR	GRMZM2G404702_T01	CTACTGCATCGCGTTTGAGC	ACAGGCCCTCTAAAAGCCAA
ZmHMA10_qRTPCR	GRMZM2G143512_T01	TGCCTGTCCTTGTGCCTTAG	CACCCTTGATCAGAACGCCT
ZmHMA11_qRTPCR	GRMZM2G010152_T01	GGGATCAAGAGACATGCGACA	GGCCTCACCGATAATGCCTA
ZmHMA12_qRTPCR	GRMZM2G151406_T01	TCCTCACACCGGGTAAGTCT	CCCCAAGAGATTTTGAGAGGTG
ZmHMA2_resequencing	GRMZM2G099191-1	GTCTCCGCAACTTACCACCA	ACGGAGCCATCACATTGGTC
	GRMZM2G099191-2	ATGGATGGGTGTGTGCAGAG	GAAGACAGAAGACAAGCCGC
	GRMZM2G099191-3	GGATTCCTGCCGAACTGGAT	GAAGGGCCGTTTTAGAACCC
ZmHMA3_resequencing	GRMZM2G175576-1	GCATAGGGCAAGTAACGC	CTGTCGTCCTCACGGCTA
	GRMZM2G175576-2	GCCATCGTGTTCCTCTTC	TTGTTGCCCTGCCTTCTT
	GRMZM2G175576-3	AGCGTCCTGGTGTTGTGG	TCGGCTTGTCCTATTCATTT
ZmHMA2_Subcellular Localization	GRMZM2G099191	CCGGGGATCCTCTAGAATGGGGGACGCTGCGGCGG	TAGTGTCGACTCTAGACTACTCTACCACGATCTCGG
ZmHMA3_Subcellular Localization	GRMZM2G175576	GGGTACCCGGGGATCCATGGGCAGTGTCGAGGAGAG	GGGTACCCGGGGATCCTCACTTGAGATTTGATATTG
