# Supplementary material for: Genome-wide identification of ZmHMAs and association of natural variation in ZmHMA2 and ZmHMA3 with leaf cadmium accumulation in maize
Source: PeerJ. 2019 Oct 23;7:e7877. doi: 10.7717/peerj.7877 (PMC6815194; doi:10.7717/peerj.7877)
Supplement: Table S3 [file peerj-07-7877-s003.xlsx]

## Sheet: Table  S3
Table S3 Pedigree information for the 103 maize accessions used in the present study
No.	Acession for DNA sequence of ZmHMA2		Acession for DNA sequence of ZmHMA3
	Name	Pedigree	Name	Pedigree
1	B73	BSSS C5	B73	BSSS C5
2	07G83	07G83	06WAM110	CIMMYT line
3	08-641	Derived from Pioneer hybrid Y78641	07WSWD146	07WSWD146
4	10GY92-121	10GY92-121	10GY76-111	10GY76-111
5	10WRA120	10WRA120	10WRA120	10WRA120
6	11GD003	11GD003	11GP30-1	Unknown
7	11GP30-1	11GP30-1	18-9-101	Nan99 / Nan70-3 Nanxiao18
8	1572	1572	205-11	Foreign hybrid Y7865F2 × Qi205
9	18-599	Derived from Pioneer hybrid 78599	21A	Derived from Tropical germplasm
10	18-9-101	Nan99 / Nan70-3 Nanxiao18	2369	2702H × B73) × B73, SS
11	2369	2702H × B73) × B73, SS	434	434
12	4379	4379	48-2	(Mo17 / Dan340) // 6 unknown lines
13	48-2	(Mo17 / Dan340) // 6 unknown lines	5311	Derived from suwan germplasm
14	618	Derived from Pioneer unknown hybrid	618	Derived from Pioneer unknown hybrid
15	7327	7327	646	Lancaster L3874 × Tropical germplasm
16	891	Derived from Pioneer hybrid 78599	7041-5	Derived from Yogoslavic hybrid SC704
17	9614	Tropical germplasm	7327	7327
18	98-3	TuxpenoPBC15S1 ×(JinO3 × Huobai)	78599-211	Derived from Pioneer hybrid 78599
19	9HT1736	Unknown	81565-2	TuxpenoPBC15S1 ×(JinO3 × Huobai)
20	BJ005	BJ005	9HT1736	Unknown
21	CA1108	Huangzaosi improved line	A318	S37 space induced mutation
22	CA211	CA211	B047	B047
23	CD30M	Hybrid CGT-15	B151	Derived from Pioneer unknown hybrid
24	CG698	Derived from Pioneer hybrid 78599	BS08-565	BS08-565
25	CHANG7-2	Wei95×Huangzaosi//S901	BS1074	BS1074
26	CIMMYT-1	CIMMYT-1	CA1108	Huangzaosi improved line
27	CLRCW48	CIMMYT line	CG921	Hai921 improved line
28	CLWN201	CIMMYT line	CHANG7-2	Wei95×Huangzaosi//S901
29	CML379	1221CL8	CIMMYT-1	CIMMYT-1
30	DE2010-1	De2010-1	CL8	1221CL8
31	DU321	American hybrid 3382	CLRCY041	CIMMYT line
32	H127RE	American hybrid Y8G61	CLWN226	CIMMYT line
33	H921	78599 × (6166 + 6066 + 6165)	CLWN251	CIMMYT line
34	HUANGC	(Huangxiao162 × Zi330 / 02) × Tuxpeno	CLYN223	CIMMYT line
35	HZ127-7	Derived from American hybrid Y8G61	CML282	CIMMYT line
36	JH961	Derived from Pioneer hybrid 78599	CML308	CIMMYT line
37	JH96B	Derived from Zhongzong2	CML447	CIMMYT line
38	JI477	Mo17 radiation	CML451	CIMMYT line
39	JI992	Ji992	CN9802	American inbred line，Reid population
40	JIAO51	Guizhou landrace Jiaomaerhuangzao	CTL26	Derived from suwan germplasm
41	K22	K11 × Ye478	DAN3130	Derived from Pioneer hybrid 78599
42	K305	American hybrid 2021	DAN598	Dan598
43	K363	48-2 × 156	DAN9046	7922 × 5003
44	LIAO5144	7922 / 5003	DH29	Derived from Pioneer hybrid 78599
45	LS-22	LS-22	DONG156	Dong156
46	LSC107	87-1 × 86-1	F19	Derived from CIMMYT germplasm
47	LSC127	LSC127	FG-1	Tropical germplasm
48	LYC-1	LONG Xichang	GCML140	CIMMYT line
49	M232	65232/P6C3 // 65232	JF52-3	JF52-3
50	M3-0	Tropical germplasm	JH96B	Derived from Zhongzong2
51	M89	K22 improved line	JI1037	Mo17 / suwan1 // MO17
52	MDH3-200	MDH3-200	JIAO51	Guizhou landrace Jiaomaerhuangzao
53	MIAN714	YA3237 / CIMMYT hybrid	JS0251	Dan85566/E28 second circle line
54	MIAN723	P953 × 698-3	K102	K102
55	MO17	C2010-3	K169R	Derived from American hybrid 3163
56	NAN202	Zong3 / Niu2-1	L2010-3	C2010-3
57	NAN637	Nan637	LC955	LC955
58	NZ013-1	Neizi013-1-1	LIAO3053	(7922 × B68) / 5003
59	NZ925	NZ925	LIAO5144	7922 / 5003
60	P138	Derived from Pioneer hybrid 78599	LIN-1	478 improved line
61	P953	Derived from hybrid 95-3	LJ-2	American hybrid Liaojian
62	PH6WC	PH01N × PH09B, Reid population	LM-6	LM-6
63	PHC63	PHC63	LS-22	LS-22
64	Q78	Q78	LSC127	LSC127
65	QBII-1	1221CL13	LX312	LX312
66	QI205	vAi141 × Zhongxi017/QPM70	LYC-1	LONG Xichang
67	QI319	Derived from Pioneer hybrid 78599	LZM004	Tropical germplasm
68	S273	Derived from suwan germplasm	LZM05-1-1	Tropical germplasm
69	S37	Derived from suwan1	M3-0	Tropical germplasm
70	S5003	Derived from suwan germplasm	MH9	Derived from Mohuang9 population
71	S7913	S7913	MIAN715	Hybrid CGT-15
72	SAM1001	Tropical germplasm TI5604	N54-3	N54-3
73	SCML103	698-3 / unknown line	NAN21-3	Yogoslavic hybrid BC8241Ht
74	SCML203	(48-2 × 5003) space induced mutation × foreign hybrid	NAN381	Ai351/B9001 // Ai351BC2
75	SH15	Derived from Pioneer hybrid 78599	NAN637	Nan637
76	SHEN135	Derived from Pioneer hybrid 78599	PH4CV	PH7V0 × PHBE2，Lancaster population
77	SHUANGM9	M9 × M9B	PH6WC	PH01N × PH09B, Reid population
78	SU1611	Derived from suwan germplasm	PHW65	(861 / 595) × 8211131X,NSS
79	SU95-1	Ye478 × Ji183	PI43W	PI43W
80	SW01D1058-5	CIMMYT line	QBII-1	1221CL13
81	T32	Derived from suwan germplasm	QI533	Derived from P136 abnormal plant
82	TIE7922	American hybrid 3382	S5003	Derived from suwan germplasm
83	TL96B	CIMMYT line	S7913	S7913
84	TL98A1709-20	CIMMYT line	SCML1950	American hybrid 441950
85	V37	V37	SHEN135	Derived from Pioneer hybrid 78599
86	W30	K22 improved line	SHEN136	Derived from Pioneer hybrid 78599
87	W8034	B14A/2 × B73, SS	SW01D1031-14	CIMMYT line
88	W8199	11278199	SW01D1031-17	CIMMYT line
89	WZ-1	W1 Wanzhou	T32	Derived from suwan germplasm
90	XBY2193	SUWAN germplasm	TD1	478 improved line
91	XH05	Yunnan White XH05 × American hybrid	TL96B	CIMMYT line
92	YA8201	Brazilian hybrid AGROLERES1051	W031-1	W031-1
93	YE478	U8112 × Shen5003	W284	W284
94	YI99	Zhengda hybrid 99-19	W30	K22 improved line
95	YU561	Nongda202 × 095	W8071	Tropical germplasm
96	ZD808-1	Hybrid ZD808	W8199	11278199
97	ZH64	Derived from Pioneer hybrid 64	WZ-1	W1 Wanzhou
98	ZHENG22	E28/Duqing second circle line	XBY2193	SUWAN germplasm
99	ZHENG28	Zheng28	XH05	Yunnan White XH05 × American hybrid
100	ZHENG29	Zheng29	YA8201	Brazilian hybrid AGROLERES1051
101	ZHENG99	Zheng99	YI99	Zhengda hybrid 99-19
102	ZJ-3	WS527 × 7031	ZHENG99	Zheng99
103	ZY2247	ZY2247	ZJ-3	WS527 × 7031
