# Supplementary material for: Genome-wide identification of ZmHMAs and association of natural variation in ZmHMA2 and ZmHMA3 with leaf cadmium accumulation in maize
Source: PeerJ. 2019 Oct 23;7:e7877. doi: 10.7717/peerj.7877 (PMC6815194; doi:10.7717/peerj.7877)
Supplement: Table S5 [file peerj-07-7877-s005.xlsx]

## Sheet: Table S5
Table S5 | Prediction of transmembrane helices in ZmHMA2, ZmHMA3 and ZmHMA4
ID	No.	N terminal	Transmembrane Region	C terminal	type	length
ZmHMA2	1	108	LVVSLFERLWPPLKWCALAAAAA	130	SECONDARY	23
	2	146	LTLDVNILMLIAVSGAIALKD	166	PRIMARY	21
	3	315	CAKYYTPAVVVMAAGVAVVPVVV	337	PRIMARY	23
	4	355	SACPCALVLSTPVATFCALLTAA	377	PRIMARY	23
	5	653	RTIVVNIVFSVITKLAIVGLALA	675	PRIMARY	23
	6	682	AAVLADVGTCMLVIMYSMLLLR	703	PRIMARY	22
ZmHMA3	1	37	YLDVLGVCCSAEVALVERLLKPI	59	SECONDARY	23
	2	123	ALLLASLFAPLLPSLRWLALAAA	145	PRIMARY	23
	3	156	ALAAGLALDINALMLVAVAGAAA	178	PRIMARY	23
	4	184	EAGAIVFLFTTAEWLETLACTKA	206	SECONDARY	23
	5	209	GMSSLMSMVPPTVVLAQTGEVVG	231	SECONDARY	23
	6	334	YTPAVVAVAAGVALVPLLLGPRG	356	PRIMARY	23
	7	373	SACPCALVLSTPVATFCALLRAA	395	PRIMARY	23
	8	674	ATVAANVIASVGAKAAVLALAAA	696	PRIMARY	23
	9	701	LWVAVLADVGTCLLVVLHSMLLL	723	PRIMARY	23
ZmHMA4	1	63	TYLDVLGICCTAEVALVERLLAP	85	SECONDARY	23
	2	144	PFIVACGVLLAASLFAPLLPPLR	166	PRIMARY	23
	3	168	LAVAAACVGSQPMLLRAFAAAGK	190	PRIMARY	23
	4	196	NILMLIAVAGAVALGSY	212	PRIMARY	17
	5	216	GAIVFLFTVAEWLETLACTKASA	238	SECONDARY	23
	6	364	YTPAVVVLAAGVVLVPVLLGAPD	386	PRIMARY	23
	7	400	SACPCALVLSTPVATFCALLRAA	422	PRIMARY	23
	8	703	TIAVNVASSVGAKAAVLALAVAW	725	SECONDARY	23
	9	732	AVLADVGTCLLVVLHSMLLLRDA	754	PRIMARY	23
