# Supplementary material for: Genome-wide identification of ZmHMAs and association of natural variation in ZmHMA2 and ZmHMA3 with leaf cadmium accumulation in maize
Source: PeerJ. 2019 Oct 23;7:e7877. doi: 10.7717/peerj.7877 (PMC6815194; doi:10.7717/peerj.7877)
Supplement: Table S6 [file peerj-07-7877-s006.xlsx]

## Sheet: Table S6
Table S6 | Nucleotide diversity analysis of ZmHMA2 in 103 maize accessions
Accessions / Sites	10	53	56	60	63	67	91	214	219	234	288	321	326	361	363	375	435	513	528	569	574	577	579	607	609	622	669	672	700	725	750	777	793	797	824	825	838	839	840	843	856	901	904	907	913	914	919	920	945
B73	A	0	C	T	2	T	C	5	C	A	G	G	0	G	9	G	C	C	C	5	C	T	C	G	A	C	G	C	G	T	3	0	G	1	T	A	1	C	1	4	A	A	A	0	C	C	0	C	G
07G83	C	9	-	-	2	T	C	0	G	C	G	C	0	G	0	G	C	T	T	0	G	C	T	C	A	C	C	G	G	G	0	0	T	1	T	A	0	A	0	4	C	T	A	0	C	C	3	-	A
08-641	A	0	C	T	2	T	C	5	C	A	G	G	0	G	9	G	C	C	C	5	C	T	C	G	A	C	G	C	G	T	3	0	G	1	T	A	1	C	1	4	A	A	A	0	C	C	0	C	G
10GY92-121	C	9	-	-	2	T	C	0	G	C	G	C	0	G	0	G	C	T	T	0	G	C	T	C	A	C	C	G	G	G	0	3	G	1	C	T	0	C	0	0	C	T	G	6	T	C	0	G	A
10WRA120	A	0	C	T	2	T	C	5	C	A	G	G	0	G	9	G	C	C	C	5	C	T	C	G	A	C	G	C	G	T	3	0	G	1	T	A	1	C	1	4	A	A	A	0	C	C	0	C	G
11GD003	A	0	C	T	2	T	C	5	C	A	G	G	0	G	9	G	C	C	C	5	C	T	C	G	A	C	G	C	G	T	3	0	G	1	T	A	1	C	1	4	A	A	A	0	C	C	0	C	G
11GP30-1	A	0	C	T	2	T	C	5	C	A	G	G	0	G	9	G	C	C	C	5	C	T	C	G	A	C	G	C	G	T	3	0	G	1	T	A	1	C	1	4	A	A	A	0	C	C	0	C	G
1572	C	9	-	-	2	T	C	0	G	C	G	C	0	G	0	G	C	T	T	0	G	C	T	C	A	C	C	G	G	G	0	0	T	1	T	A	0	A	0	4	C	T	A	0	C	C	3	-	A
18-599	A	0	C	T	2	T	C	5	C	A	G	G	0	G	9	G	C	C	C	5	C	T	C	G	A	C	G	C	G	T	3	0	G	1	T	A	1	C	1	4	A	A	A	0	C	C	0	C	G
18-9-101	C	9	-	-	2	T	C	0	G	C	G	C	0	G	0	G	C	T	T	0	G	C	T	C	A	C	C	G	G	G	0	3	G	1	C	T	0	C	0	0	C	T	G	6	T	C	0	G	A
2369	A	0	C	T	2	T	C	5	C	A	G	G	0	G	9	G	C	C	C	5	C	T	C	G	A	C	G	C	G	T	3	0	G	1	T	A	1	C	1	4	A	A	A	0	C	C	0	C	G
4379	C	0	T	C	0	C	T	5	G	C	T	G	10	A	9	G	A	C	C	5	C	T	C	C	C	T	G	G	C	T	0	0	G	0	T	A	1	C	1	4	A	A	A	0	C	T	0	C	A
48-2	C	0	T	C	0	C	T	5	G	C	T	G	10	A	9	G	A	C	C	5	C	T	C	C	C	T	G	G	C	T	0	0	G	0	T	A	1	C	1	4	A	A	A	0	C	T	0	C	A
618	C	0	T	C	0	C	T	5	G	C	T	G	10	A	9	G	A	C	C	5	C	T	C	C	C	T	G	G	C	T	0	0	G	0	T	A	1	C	1	4	A	A	A	0	C	T	0	C	A
7327	C	0	T	C	0	C	T	5	G	C	T	G	10	A	9	T	A	C	C	5	C	T	C	C	C	T	G	G	G	T	0	0	T	1	T	A	1	C	1	4	?	A	A	0	C	C	0	C	A
891	C	0	T	C	0	C	T	5	G	C	T	G	10	A	9	G	A	C	C	5	C	T	C	C	C	T	G	G	C	T	0	0	G	0	T	A	1	C	1	4	A	A	A	0	C	T	0	C	A
9614	C	0	T	C	0	C	T	5	G	C	T	G	10	A	9	G	A	C	C	5	C	T	C	C	C	T	G	G	C	T	0	0	G	0	T	A	1	C	1	4	A	A	A	0	C	T	0	C	A
98-3	A	0	C	T	2	T	C	5	C	A	G	G	0	G	9	G	C	C	C	5	C	T	C	G	A	C	G	C	G	T	3	0	G	1	T	A	1	C	1	4	A	A	A	0	C	C	0	C	G
9HT1736	A	0	C	T	2	T	C	5	C	A	G	G	0	G	9	G	C	C	C	5	C	T	C	G	A	C	G	C	G	T	3	0	G	1	T	A	1	C	1	4	A	A	A	0	C	C	0	C	G
BJ005	A	0	C	T	2	T	C	5	C	A	G	G	0	G	9	G	C	C	C	5	C	T	C	G	A	C	G	C	G	T	3	0	G	1	T	A	1	C	1	4	A	A	A	0	C	C	0	C	G
CA1108	C	0	T	C	0	C	T	5	G	C	T	G	10	A	9	G	A	C	C	5	C	T	C	C	C	T	G	G	C	T	0	0	G	0	T	A	1	C	1	4	A	A	A	0	C	T	0	C	A
CA211	A	0	C	T	2	T	C	5	C	A	G	G	0	G	9	G	C	C	C	5	C	T	C	G	A	C	G	C	G	T	3	0	G	1	T	A	1	C	1	4	A	A	A	0	C	C	0	C	G
CD30M	C	0	T	C	0	C	T	5	G	C	T	G	10	A	9	G	A	C	C	5	C	T	C	C	C	T	G	G	C	T	0	0	G	0	T	A	1	C	1	4	A	A	A	0	C	T	0	C	A
CG698	A	0	C	T	2	T	C	5	C	A	G	G	0	G	9	G	C	C	C	5	C	T	C	G	A	C	G	C	G	T	3	0	G	1	T	A	1	C	1	4	A	A	A	0	C	C	0	C	G
CHANG7-2	C	0	T	C	2	T	C	5	C	C	G	G	0	A	9	T	C	C	C	5	C	T	C	C	C	C	G	G	G	G	0	0	T	1	T	A	0	A	0	4	C	T	A	0	C	C	3	-	A
CIMMYT-1	C	0	T	C	0	C	T	5	G	C	T	G	10	A	9	G	A	C	C	5	C	T	C	C	C	T	G	G	C	T	0	0	G	0	T	A	1	C	1	4	A	A	A	0	C	T	0	C	A
CLRCW48	C	0	T	C	0	C	T	5	G	C	T	G	10	A	9	G	A	C	C	5	C	T	C	C	C	T	G	G	C	T	0	0	G	0	T	A	1	C	1	4	A	A	A	0	C	T	0	C	A
CLWN201	C	9	-	-	2	T	C	0	G	C	G	C	0	G	0	G	C	T	T	5	C	T	C	C	C	C	G	G	G	T	0	3	G	1	T	A	1	C	1	4	C	T	G	6	T	C	0	C	A
CML379	C	0	T	C	0	C	T	5	G	C	T	G	10	A	9	T	A	C	C	5	C	T	C	C	C	T	G	G	G	T	0	0	T	1	T	A	1	C	1	4	?	A	A	0	C	C	0	C	A
DE2010-1	C	0	T	C	0	C	T	5	G	C	T	G	10	A	9	G	A	C	C	5	C	T	C	C	C	T	G	G	C	T	0	0	G	0	T	A	1	C	1	4	A	A	A	0	C	T	0	C	A
DU321	A	0	C	T	2	T	C	5	C	A	G	G	0	G	9	G	C	C	C	5	C	T	C	G	A	C	G	C	G	T	3	0	G	1	T	A	1	C	1	4	A	A	A	0	C	C	0	C	G
H127RE	A	0	C	T	2	T	C	5	C	A	G	G	0	G	9	G	C	C	C	5	C	T	C	G	A	C	G	C	G	T	3	0	G	1	T	A	1	C	1	4	A	A	A	0	C	C	0	C	G
H921	C	9	-	-	2	T	C	0	G	C	G	C	0	G	0	G	C	T	T	0	G	C	T	C	A	C	C	G	G	G	0	0	T	1	T	A	0	A	0	4	C	T	A	0	C	C	3	-	A
HUANGC	A	0	C	T	2	T	C	5	C	A	G	G	0	G	9	G	C	C	C	5	C	T	C	G	A	C	G	C	G	T	3	0	G	1	T	A	1	C	1	4	A	A	A	0	C	C	0	C	G
HZ127-7	A	0	C	T	2	T	C	5	C	A	G	G	0	G	9	G	C	C	C	5	C	T	C	G	A	C	G	C	G	T	3	0	G	1	T	A	1	C	1	4	A	A	A	0	C	C	0	C	G
JH961	C	0	T	C	0	C	T	5	G	C	T	G	10	A	9	T	A	C	C	5	C	T	C	C	C	T	G	G	G	T	0	0	T	1	T	A	1	C	1	4	?	A	A	0	C	C	0	C	A
JH96B	A	0	C	T	2	T	C	?	-	A	G	G	0	G	9	G	C	C	C	5	C	T	C	G	A	C	G	C	G	T	3	0	G	1	T	A	1	C	1	4	A	A	A	0	C	C	0	C	G
JI477	A	5	T	-	2	T	C	0	G	C	G	C	0	G	6	G	C	C	C	5	C	T	C	G	A	C	G	C	G	T	3	0	G	1	T	A	1	C	1	4	A	A	A	0	C	C	0	C	G
JI992	C	0	T	C	0	C	T	5	G	C	T	G	10	A	9	G	A	C	C	5	C	T	C	C	C	T	G	G	C	T	0	0	G	0	T	A	1	C	1	4	A	A	A	0	C	T	0	C	A
JIAO51	C	0	T	C	2	T	C	5	C	C	G	G	0	A	9	T	C	C	C	5	C	T	C	C	C	C	G	G	G	G	0	0	T	1	T	A	0	A	0	4	C	T	A	0	C	C	3	-	A
K22	A	0	C	T	2	T	C	5	C	A	G	G	0	G	9	G	C	C	C	5	C	T	C	G	A	C	G	C	G	T	3	0	G	1	T	A	1	C	1	4	A	A	A	0	C	C	0	C	G
K305	C	0	T	C	0	C	T	5	G	C	T	G	10	A	9	G	A	C	C	5	C	T	C	C	C	T	G	G	C	T	0	0	G	0	T	A	1	C	1	4	A	A	A	0	C	T	0	C	A
K363	A	0	C	T	2	T	C	5	C	A	G	G	0	G	9	G	C	C	C	5	C	T	C	G	A	C	G	C	G	T	3	0	G	1	T	A	1	C	1	4	A	A	A	0	C	C	0	C	G
LIAO5144	C	9	-	-	2	T	C	0	G	C	G	C	0	G	0	G	C	T	T	0	G	C	T	C	A	C	C	G	G	G	0	3	G	1	C	T	0	C	0	0	C	T	G	6	T	C	0	G	A
LS-22	A	0	C	T	2	T	C	5	C	A	G	G	0	G	9	G	C	C	C	5	C	T	C	G	A	C	G	C	G	T	3	0	G	1	T	A	1	C	1	4	A	A	A	0	C	C	0	C	G
LSC107	A	0	C	T	2	T	C	5	C	A	G	G	0	G	9	G	C	C	C	5	C	T	C	G	A	C	G	C	G	T	3	0	G	1	T	A	1	C	1	4	A	A	A	0	C	C	0	C	G
LSC127	C	0	T	C	2	T	C	0	C	C	G	G	0	G	0	T	C	C	C	5	C	T	C	C	C	C	G	G	G	G	0	0	T	1	T	A	0	A	0	4	C	T	A	0	C	C	3	-	A
LYC-1	C	9	-	-	2	T	C	0	G	C	G	C	0	G	0	G	C	T	T	0	G	C	T	C	A	C	C	G	G	G	0	3	G	1	C	T	0	C	0	0	C	T	G	6	T	C	0	G	A
M232	A	0	C	T	2	T	C	5	C	A	G	G	0	G	9	G	C	C	C	5	C	T	C	G	A	C	G	C	G	T	3	0	G	1	T	A	1	C	1	4	A	A	A	0	C	C	0	C	G
M3-0	C	0	T	C	0	C	T	5	G	C	T	G	10	A	9	G	A	C	C	5	C	T	C	C	C	T	G	G	C	T	0	0	G	0	T	A	1	C	1	4	A	A	A	0	C	T	0	C	A
M89	A	0	C	T	2	T	C	5	C	A	G	G	0	G	9	G	C	C	C	5	C	T	C	G	A	C	G	C	G	T	3	0	G	1	T	A	1	C	1	4	A	A	A	0	C	C	0	C	G
MDH3-200	C	9	-	-	2	T	C	0	G	C	G	C	0	G	0	G	C	T	T	0	G	C	T	C	A	C	C	G	G	G	0	3	G	1	C	T	0	C	0	0	C	T	G	6	T	C	0	G	A
MIAN714	C	0	T	C	0	C	T	5	G	C	T	G	10	A	9	G	A	C	C	5	C	T	C	C	C	T	G	G	C	T	0	0	G	0	T	A	1	C	1	4	A	A	A	0	C	T	0	C	A
MIAN723	A	0	C	T	2	T	C	5	C	A	G	G	0	G	9	G	C	C	C	5	C	T	C	G	A	C	G	C	G	T	3	0	G	1	T	A	1	C	1	4	A	A	A	0	C	C	0	C	G
MO17	A	0	C	T	2	T	C	5	C	A	G	G	0	G	9	G	C	C	C	5	C	T	C	G	A	C	G	C	G	T	3	0	G	1	T	A	1	C	1	4	A	A	A	0	C	C	0	C	G
NAN202	C	12	-	-	12	T	C	0	G	C	G	C	0	G	0	G	C	T	T	0	G	C	T	C	A	C	C	G	G	G	0	0	T	1	T	A	0	A	0	4	C	T	A	0	C	C	3	-	A
NAN637	A	0	C	T	2	T	C	5	C	A	G	G	0	G	9	G	C	C	C	5	C	T	C	G	A	C	G	C	G	T	3	0	G	1	T	A	1	C	1	4	A	A	A	0	C	C	0	C	G
NZ013-1	A	0	C	T	2	T	C	5	C	A	G	G	0	G	9	G	C	C	C	5	C	T	C	G	A	C	G	C	G	T	3	0	G	1	T	A	1	C	1	4	A	A	A	0	C	C	0	C	G
NZ925	A	0	C	T	2	T	C	5	C	A	G	G	0	G	9	G	C	C	C	5	C	T	C	G	A	C	G	C	G	T	3	0	G	1	T	A	1	C	1	4	A	A	A	0	C	C	0	C	G
P138	C	0	T	C	0	C	T	5	G	C	T	G	10	A	9	G	A	C	C	5	C	T	C	C	C	T	G	G	C	T	0	0	G	0	T	A	1	C	1	4	A	A	A	0	C	T	0	C	A
P953	A	0	C	T	2	T	C	5	C	A	G	G	0	G	9	G	C	C	C	5	C	T	C	G	A	C	G	C	G	T	3	0	G	1	T	A	1	C	1	4	A	A	A	0	C	C	0	C	G
PH6WC	C	0	T	C	0	C	T	5	G	C	T	G	10	A	9	G	A	C	C	5	C	T	C	C	C	T	G	G	C	T	0	0	G	0	T	A	1	C	1	4	A	A	A	0	C	T	0	C	A
PHC63	A	0	C	T	2	T	C	5	C	A	G	G	0	G	9	G	C	C	C	5	C	T	C	G	A	C	G	C	G	T	3	0	G	1	T	A	1	C	1	4	A	A	A	0	C	C	0	C	G
Q78	A	0	C	T	2	T	C	5	C	A	G	G	0	G	9	G	C	C	C	5	C	T	C	G	A	C	G	C	G	T	3	0	G	1	T	A	1	C	1	4	A	A	A	0	C	C	0	C	G
QBII-1	C	0	T	C	0	C	T	5	G	C	T	G	10	A	9	G	A	C	C	5	C	T	C	C	C	T	G	G	C	T	0	0	G	0	T	A	1	C	1	4	A	A	A	0	C	T	0	C	A
QI205	C	0	T	C	0	C	T	5	G	C	T	G	10	A	9	G	A	C	C	5	C	T	C	C	C	T	G	G	C	T	0	0	G	0	T	A	1	C	1	4	A	A	A	0	C	T	0	C	A
QI319	C	0	T	C	0	C	T	5	G	C	T	G	10	A	9	G	A	C	C	5	C	T	C	C	C	T	G	G	C	T	0	0	G	0	T	A	1	C	1	4	A	A	A	0	C	T	0	C	A
S273	C	0	T	C	0	C	T	5	G	C	T	G	10	A	9	G	A	C	C	5	C	T	C	C	C	T	G	G	C	T	0	0	G	0	T	A	1	C	1	4	A	A	A	0	C	T	0	C	A
S37	C	9	-	-	2	T	C	0	G	C	G	C	0	G	0	G	C	T	T	0	G	C	T	C	A	C	C	G	G	G	0	3	G	1	C	T	0	C	0	0	C	T	G	6	T	C	0	G	A
S5003	C	9	-	-	2	T	C	0	G	C	G	C	0	G	0	G	C	T	T	0	G	C	T	C	A	C	C	G	G	G	0	3	G	1	C	T	0	C	0	0	C	T	G	6	T	C	0	G	A
S7913	C	0	T	C	0	C	T	5	G	C	T	G	10	A	9	G	A	C	C	5	C	T	C	C	C	T	G	G	C	T	0	0	G	0	T	A	1	C	1	4	A	A	A	0	C	T	0	C	A
SAM1001	A	0	C	T	2	T	C	5	C	A	G	G	0	G	9	G	C	C	C	5	C	T	C	G	A	C	G	C	G	T	3	0	G	1	T	A	1	C	1	4	A	A	A	0	C	C	0	C	G
SCML103	A	0	C	T	2	T	C	5	C	A	G	G	0	G	9	G	C	C	C	5	C	T	C	G	A	C	G	C	G	T	3	0	G	1	T	A	1	C	1	4	A	A	A	0	C	C	0	C	G
SCML203	A	0	C	T	2	T	C	5	C	A	G	G	0	G	9	G	C	C	C	5	C	T	C	G	A	C	G	C	G	T	3	0	G	1	T	A	1	C	1	4	A	A	A	0	C	C	0	C	G
SH15	C	0	T	C	0	C	T	5	G	C	T	G	10	A	9	G	A	C	C	5	C	T	C	C	C	T	G	G	C	T	0	0	G	0	T	A	1	C	1	4	A	A	A	0	C	T	0	C	A
SHEN135	C	0	T	C	0	C	T	5	G	C	T	G	10	A	9	G	A	C	C	5	C	T	C	C	C	T	G	G	C	T	0	0	G	0	T	A	1	C	1	4	A	A	A	0	C	T	0	C	A
SHUANGM9	C	9	-	-	2	T	C	0	G	C	G	C	0	G	0	G	C	T	T	0	G	C	T	C	A	C	C	G	G	G	0	3	G	1	C	T	0	C	0	0	C	T	G	6	T	C	0	G	A
SU1611	C	9	-	-	2	T	C	0	G	C	G	C	0	G	0	G	C	T	T	0	G	C	T	C	A	C	C	G	G	G	0	3	G	1	C	T	0	C	0	0	C	T	G	6	T	C	0	G	A
SU95-1	A	0	C	T	2	T	C	5	C	A	G	G	0	G	9	G	C	C	C	5	C	T	C	G	A	C	G	C	G	T	3	0	G	1	T	A	1	C	1	4	A	A	A	0	C	C	0	C	G
SW01D1058-5	C	0	T	C	0	C	T	5	G	C	T	G	10	A	9	G	A	C	C	5	C	T	C	C	C	T	G	G	C	T	0	0	G	0	T	A	1	C	1	4	A	A	A	0	C	T	0	C	A
T32	C	9	-	-	2	T	C	0	G	C	G	C	0	G	0	G	C	T	T	0	G	C	T	C	A	C	C	G	G	G	0	3	G	1	C	T	0	C	0	0	C	T	G	6	T	C	0	G	A
TIE7922	A	0	C	T	2	T	C	5	C	A	G	G	0	G	9	G	C	C	C	5	C	T	C	G	A	C	G	C	G	T	3	0	G	1	T	A	1	C	1	4	A	A	A	0	C	C	0	C	G
TL96B	C	9	-	-	2	T	C	0	G	C	G	C	0	G	0	G	C	T	T	0	G	C	T	C	A	C	C	G	G	G	0	3	G	1	C	T	0	C	0	0	C	T	G	6	T	C	0	G	A
TL98A1709-20	C	9	-	-	2	T	C	0	G	C	G	C	0	G	0	G	C	T	T	0	G	C	T	C	A	C	C	G	G	G	0	3	G	1	C	T	0	C	0	0	C	T	G	6	T	C	0	G	A
V37	A	0	C	T	2	T	C	5	C	A	G	G	0	G	9	G	C	C	C	5	C	T	C	G	A	C	G	C	G	T	3	0	G	1	T	A	1	C	1	4	A	A	A	0	C	C	0	C	G
W30	A	0	C	T	2	T	C	5	C	A	G	G	0	G	9	G	C	C	C	5	C	T	C	G	A	C	G	C	G	T	3	0	G	1	T	A	1	C	1	4	A	A	A	0	C	C	0	C	G
W8034	A	9	-	-	2	T	C	0	G	C	G	C	0	G	9	G	C	C	C	5	C	T	C	G	A	C	G	C	G	T	3	0	G	1	T	A	1	C	1	4	A	A	A	0	C	C	0	C	G
W8199	A	0	C	T	2	T	C	5	C	A	G	G	0	G	9	G	C	C	C	5	C	T	C	G	A	C	G	C	G	T	3	0	G	1	T	A	1	C	1	4	A	A	A	0	C	C	0	C	G
WZ-1	C	0	T	C	0	C	T	5	G	C	T	G	10	A	9	G	A	C	C	5	C	T	C	C	C	T	G	G	C	T	0	0	G	0	T	A	1	C	1	4	A	A	A	0	C	T	0	C	A
XBY2193	C	0	T	C	0	C	T	5	G	C	T	G	10	A	9	G	A	C	C	5	C	T	C	C	C	T	G	G	C	T	0	0	G	0	T	A	1	C	1	4	A	A	A	0	C	T	0	C	A
XH05	A	9	-	-	2	T	C	0	G	C	G	C	0	G	9	G	C	C	C	5	C	T	C	G	A	C	G	C	G	T	3	0	G	1	T	A	1	C	1	4	A	A	A	0	C	C	0	C	G
YA8201	C	0	T	C	0	C	T	5	G	C	T	G	10	A	9	G	A	C	C	5	C	T	C	C	C	T	G	G	C	T	0	0	G	0	T	A	1	C	1	4	A	A	A	0	C	T	0	C	A
YE478	A	0	C	T	2	T	C	5	C	A	G	G	0	G	9	G	C	C	C	5	C	T	C	G	A	C	G	C	G	T	3	0	G	1	T	A	1	C	1	4	A	A	A	0	C	C	0	C	G
YI99	C	9	-	-	2	T	C	0	G	C	G	C	0	G	0	G	C	T	T	0	G	C	T	C	A	C	C	G	G	G	0	3	G	1	C	T	0	C	0	0	C	T	G	6	T	C	0	G	A
YU561	A	0	C	T	2	T	C	5	C	A	G	G	0	G	9	G	C	C	C	5	C	T	C	G	A	C	G	C	G	T	3	0	G	1	T	A	1	C	1	4	A	A	A	0	C	C	0	C	G
ZD808-1	C	0	T	C	0	C	T	5	G	C	T	G	10	A	9	G	A	C	C	5	C	T	C	C	C	T	G	G	C	T	0	0	G	0	T	A	1	C	1	4	A	A	A	0	C	T	0	C	A
ZH64	C	0	T	C	0	C	T	5	G	C	T	G	10	A	6	G	A	C	C	5	C	T	C	C	C	T	G	G	C	T	0	0	G	0	T	A	1	C	1	4	A	A	A	0	C	T	0	C	A
ZHENG22	A	0	C	T	2	T	C	5	C	A	G	G	0	G	9	G	C	C	C	5	C	T	C	G	A	C	G	C	G	T	3	0	G	1	T	A	1	C	1	4	A	A	A	0	C	C	0	C	G
ZHENG28	C	0	T	C	0	C	T	5	G	C	T	G	10	A	9	G	A	C	C	5	C	T	C	C	C	T	G	G	C	T	0	0	G	0	T	A	1	C	1	4	A	A	A	0	C	T	0	C	A
ZHENG29	A	0	C	T	2	T	C	5	C	A	G	G	0	G	9	G	C	C	C	5	C	T	C	G	A	C	G	C	G	T	3	0	G	1	T	A	1	C	1	4	A	A	A	0	C	C	0	C	G
ZHENG99	C	9	-	-	2	T	C	0	G	C	G	C	0	G	0	G	C	T	T	5	C	T	C	C	C	C	G	G	G	T	0	3	G	1	T	A	1	C	1	4	C	T	G	6	T	C	0	C	A
ZJ-3	A	0	C	T	2	T	C	5	C	A	G	G	0	G	9	G	C	C	C	5	C	T	C	G	A	C	G	C	G	T	3	0	G	1	T	A	1	C	1	4	A	A	A	0	C	C	0	C	G
ZY2247	C	9	-	-	2	T	C	0	G	C	G	C	0	G	0	G	C	T	T	0	G	C	T	C	A	C	C	G	G	G	0	3	G	1	C	T	0	C	0	0	C	T	G	6	T	C	0	G	A
[truncated: 218 more columns]
