# Supplementary material for: Genome-wide identification of ZmHMAs and association of natural variation in ZmHMA2 and ZmHMA3 with leaf cadmium accumulation in maize
Source: PeerJ. 2019 Oct 23;7:e7877. doi: 10.7717/peerj.7877 (PMC6815194; doi:10.7717/peerj.7877)
Supplement: Table S7 [file peerj-07-7877-s007.xlsx]

## Sheet: Table S7
Table S7 | Nucleotide diversity analysis of ZmHMA3 in 103 maize accessions
Accessions / Sites	118	140	141	199	209	226	361	410	419	516	600	720	771	780	842	917	921	942	944	951	957	999	1125	1167	1326	1347	1467	1469	1480	1486	1487	1488	1489	1491	1493	1522	1526	1533	1556	1568	1605	1614	1671	1674	1713	1718	1719	1720	1722
B73	T	C	A	G	A	T	1	C	T	C	C	C	A	G	5	C	C	C	C	A	G	C	C	C	G	G	C	0	G	T	G	T	T	C	0	T	2	C	G	T	C	A	G	G	G	T	G	C	10
06WAM110	T	C	A	G	A	T	1	C	T	C	C	C	C	G	0	C	C	G	C	C	G	C	G	C	A	C	C	4	T	G	G	A	A	A	8	T	2	T	C	A	G	G	A	T	G	C	?	A	0
07WSWD146	T	T	A	G	A	T	1	T	T	A	A	C	A	G	5	C	C	C	C	A	G	C	C	C	G	G	T	4	T	G	G	A	A	A	8	A	0	T	G	T	C	G	G	G	C	T	A	C	10
10GY76-111	T	C	A	G	A	T	1	C	T	C	C	C	A	G	5	C	C	C	C	A	G	C	C	C	G	G	C	0	G	T	G	T	T	C	0	T	2	C	G	T	C	A	G	G	G	T	G	C	10
10WRA120	T	C	A	G	A	T	1	T	T	A	A	C	A	G	5	C	C	C	C	A	G	C	C	C	A	C	T	4	T	G	G	A	A	A	8	A	0	T	G	T	C	G	G	G	C	T	A	C	10
11GP30-1	T	T	A	G	A	T	1	C	T	A	A	A	C	A	5	C	G	G	G	C	G	G	C	C	G	G	T	4	T	G	G	A	A	A	8	A	0	T	G	T	C	G	G	G	C	T	A	C	10
18-9-101	T	T	A	G	A	T	1	T	T	A	A	C	A	G	5	C	C	C	C	A	G	C	C	C	G	G	T	4	T	G	G	A	A	A	8	A	0	T	G	T	C	G	G	G	C	T	A	C	10
205-11	T	C	G	G	A	T	1	C	T	A	A	C	A	G	5	C	C	C	C	A	G	C	C	C	G	G	T	4	T	G	G	A	A	A	8	A	0	T	G	T	C	G	G	G	C	T	A	C	10
21A	T	C	G	G	A	T	1	C	T	A	A	C	C	A	5	G	C	G	C	C	A	G	C	C	G	G	C	0	G	T	G	T	T	C	0	T	2	C	G	T	C	A	G	G	G	T	G	C	10
2369	T	C	A	G	A	T	1	T	T	C	A	C	A	G	5	C	C	C	C	A	G	C	C	C	G	G	T	4	T	G	G	A	A	A	8	A	0	T	G	T	C	G	G	G	C	T	A	C	10
434	T	T	A	G	A	T	1	T	T	A	A	C	A	G	5	C	C	C	C	A	G	C	C	C	G	G	T	4	T	G	G	A	A	A	8	A	0	T	G	T	C	G	G	G	C	T	A	C	10
48-2	T	C	A	G	A	T	0	C	G	A	A	C	C	A	5	G	C	G	C	C	A	G	C	C	G	G	T	4	T	G	G	A	A	A	8	A	0	T	G	T	C	G	G	G	C	T	A	C	10
5311	T	C	G	G	A	T	1	T	T	A	A	C	A	G	5	C	C	C	C	A	G	C	C	C	G	G	T	4	T	G	G	A	A	A	8	A	0	T	G	T	C	G	G	G	C	T	A	C	10
618	T	C	A	G	A	T	1	T	T	A	A	C	A	G	5	C	C	C	C	A	G	C	C	C	A	C	T	4	T	G	G	A	A	A	8	A	0	T	G	T	C	G	G	G	C	T	A	C	10
646	T	C	A	G	A	T	1	C	T	A	A	C	C	A	5	G	C	G	G	C	G	G	G	T	A	G	T	3	T	G	G	A	A	A	8	A	0	T	G	T	C	G	G	G	C	T	A	C	10
7041-5	T	C	G	G	A	T	1	C	T	A	A	C	A	G	5	C	C	C	C	A	G	C	C	C	G	G	T	4	T	G	G	A	A	A	8	A	0	T	G	T	C	G	G	G	C	T	A	C	10
7327	C	T	A	C	G	C	0	C	G	A	-	C	C	A	5	G	C	G	C	C	A	G	C	C	G	G	T	4	T	G	G	A	A	A	8	A	0	T	G	T	C	G	G	G	C	T	A	C	10
78599-211	T	T	A	G	A	T	1	C	T	A	A	A	C	A	5	C	G	G	G	C	G	G	C	C	G	G	T	4	T	G	G	A	A	A	8	A	0	T	G	T	C	G	G	G	C	T	A	C	10
81565-2	T	C	G	G	A	T	1	C	T	A	A	C	A	G	5	C	C	C	C	A	G	C	C	C	G	G	T	4	T	G	G	A	A	A	8	A	0	T	G	T	C	G	G	G	C	T	A	C	10
9HT1736	T	C	A	G	A	T	0	C	G	A	A	C	C	A	5	G	C	G	C	C	A	G	C	C	G	G	T	4	T	G	G	A	A	A	8	A	0	T	G	T	C	G	G	G	C	T	A	C	10
A318	T	C	A	G	A	T	0	C	G	A	A	C	C	A	5	G	C	G	C	C	A	G	C	C	G	G	T	4	T	G	G	A	A	A	8	A	0	T	G	T	C	G	G	G	C	T	A	C	10
B047	T	T	A	G	A	T	1	C	T	A	A	A	C	A	5	C	G	G	G	C	G	G	C	C	G	G	T	4	T	G	G	A	A	A	8	A	0	T	G	T	C	G	G	G	C	T	A	C	10
B151	T	T	A	G	A	T	1	C	T	A	A	A	C	A	5	C	G	G	G	C	G	G	C	C	G	G	T	4	T	G	G	A	A	A	8	A	0	T	G	T	C	G	G	G	C	T	A	C	10
BS08-565	T	C	A	G	A	T	1	T	T	A	A	C	A	G	5	C	C	C	C	A	G	C	C	C	A	C	T	4	T	G	G	A	A	A	8	A	0	T	G	T	C	G	G	G	C	T	A	C	10
BS1074	T	T	A	G	A	T	1	T	T	A	A	C	A	G	5	C	C	C	C	A	G	C	C	C	G	G	T	4	T	G	G	A	A	A	8	A	0	T	G	T	C	G	G	G	C	T	A	C	10
CA1108	T	T	A	G	A	T	1	T	T	A	A	C	A	G	5	C	C	C	C	A	G	C	C	C	G	G	T	4	T	G	G	A	A	A	8	A	0	T	G	T	C	G	G	G	C	T	A	C	10
CG921	T	T	A	G	A	T	1	C	T	A	A	A	C	A	5	C	G	G	G	C	G	G	C	C	G	G	T	4	T	G	G	A	A	A	8	A	0	T	G	T	C	G	G	G	C	T	A	C	10
CHANG7-2	T	T	A	G	A	T	1	T	T	A	A	C	A	G	5	C	C	C	C	A	G	C	C	C	G	G	T	4	T	G	A	A	A	A	8	A	0	T	G	T	C	G	G	G	C	T	A	C	10
CIMMYT-1	T	C	G	G	A	T	1	C	T	A	A	A	C	A	5	C	G	G	G	C	G	G	C	C	A	C	C	4	T	G	A	A	A	A	8	T	2	T	C	A	G	G	A	T	G	C	?	A	0
CL8	T	C	A	G	A	T	1	C	T	C	C	C	A	G	5	C	C	C	C	A	G	C	C	C	G	G	C	0	G	T	G	T	T	C	0	T	2	C	G	T	C	A	G	G	G	T	G	C	10
CLRCY041	T	T	A	G	A	T	1	T	T	A	A	C	A	G	5	C	C	C	C	A	G	C	C	C	G	G	T	4	T	G	G	A	A	A	8	A	0	T	G	T	C	G	G	G	C	T	A	C	10
CLWN226	T	C	G	G	A	T	1	T	T	A	A	C	A	G	5	C	C	C	C	A	G	C	C	C	G	G	T	4	T	G	G	A	A	A	8	A	0	T	G	T	C	G	G	G	C	T	A	C	10
CLWN251	T	C	A	G	A	T	1	T	T	A	A	C	A	G	5	C	C	C	C	A	G	C	C	C	G	G	T	4	T	G	G	A	A	A	8	A	0	T	G	T	C	G	G	G	C	T	A	C	10
CLYN223	T	C	G	G	A	T	1	C	T	A	A	A	C	A	5	C	G	G	G	C	G	G	C	C	G	G	T	4	T	G	G	A	A	A	8	A	0	T	G	T	C	G	G	G	C	T	A	C	10
CML282	T	C	A	G	A	T	1	T	T	A	A	C	A	G	5	C	C	C	C	A	G	C	C	C	G	G	C	4	T	G	A	A	A	A	8	T	2	T	C	A	G	G	A	T	G	C	?	A	0
CML308	T	C	A	G	A	T	1	C	T	C	C	C	C	G	0	C	C	G	C	C	G	C	G	C	A	C	C	4	T	G	A	A	A	A	8	T	2	T	C	A	G	G	A	T	G	C	?	A	0
CML447	T	C	A	G	A	T	1	C	T	C	C	C	C	G	0	C	C	G	C	C	G	C	G	C	A	C	C	4	T	G	A	A	A	A	8	T	2	T	C	A	G	G	A	T	G	C	?	A	0
CML451	T	C	G	G	A	T	1	C	T	A	A	A	C	A	5	C	G	G	G	C	G	G	C	C	G	G	T	4	T	G	G	A	A	A	8	A	0	T	G	T	C	G	G	G	C	T	A	C	10
CN9802	T	C	A	G	A	T	1	C	T	C	C	C	A	G	5	C	C	C	C	A	G	C	C	C	G	G	C	0	G	T	G	T	T	C	0	T	2	C	G	T	C	A	G	G	G	T	G	C	10
CTL26	T	C	A	G	A	T	1	T	T	A	A	C	A	G	5	C	C	C	C	A	G	C	C	C	G	G	T	4	T	G	G	A	A	A	8	A	0	T	G	T	C	G	G	G	C	T	A	C	10
DAN3130	T	T	A	G	A	T	1	C	T	A	A	A	C	A	5	C	G	G	G	C	G	G	C	C	G	G	T	4	T	G	G	A	A	A	8	A	0	T	G	T	C	G	G	G	C	T	A	C	10
DAN598	T	T	A	G	A	T	1	T	T	A	A	C	A	G	5	C	C	C	C	A	G	C	C	C	G	G	T	4	T	G	G	A	A	A	8	A	0	T	G	T	C	G	G	G	C	T	A	C	10
DAN9046	T	T	A	G	A	T	1	C	T	A	A	A	C	A	5	C	G	G	G	C	G	G	C	C	G	G	T	4	T	G	G	A	A	A	8	A	0	T	G	T	C	G	G	G	C	T	A	C	10
DH29	T	T	A	G	A	T	1	C	T	A	A	C	A	G	5	G	C	G	C	C	A	G	C	C	G	G	T	4	T	G	A	A	A	A	8	A	0	T	G	T	C	G	G	G	C	T	A	C	10
DONG156	T	C	A	G	A	T	1	C	T	C	C	C	A	G	5	C	C	C	C	A	G	C	C	C	G	G	C	0	G	T	G	T	T	C	0	T	2	C	G	T	C	A	G	G	G	T	G	C	10
F19	T	C	G	G	A	T	1	C	T	A	A	A	C	A	5	C	G	G	G	C	G	G	C	C	G	G	T	4	T	G	A	A	A	A	8	T	2	T	G	A	C	A	G	G	C	T	A	C	10
FG-1	T	C	G	G	A	T	1	C	T	A	A	C	C	A	5	G	C	G	C	C	A	G	C	C	G	G	C	0	G	T	G	T	T	C	0	T	2	C	G	T	C	A	G	G	G	T	G	C	10
GCML140	T	C	A	G	A	T	1	C	T	A	A	C	C	A	5	G	C	G	G	C	G	G	G	T	A	G	T	4	T	G	G	A	A	A	8	A	0	T	G	T	C	G	G	G	C	T	A	C	10
JF52-3	T	C	G	G	A	T	1	C	T	A	A	C	C	A	5	G	C	G	C	C	A	G	C	C	G	G	C	0	G	T	G	T	T	C	0	T	2	C	G	T	C	A	G	G	G	T	G	C	10
JH96B	T	C	G	G	A	T	1	C	T	A	A	A	C	A	5	C	G	G	G	C	G	G	C	C	A	C	C	4	T	G	A	A	A	A	8	T	2	T	C	A	G	G	A	T	G	C	?	A	0
JI1037	T	C	A	G	A	T	1	C	T	C	C	C	A	G	5	C	C	C	C	A	G	C	C	C	G	G	C	0	G	T	G	T	T	C	0	T	2	C	G	T	C	A	G	G	G	T	G	C	10
JIAO51	T	C	A	G	A	T	1	C	T	C	C	C	C	G	0	C	C	G	C	C	G	C	C	C	G	G	C	0	G	T	G	T	T	C	0	T	2	C	G	T	C	A	G	G	G	T	G	C	10
JS0251	T	C	A	G	A	T	1	C	T	C	C	C	C	G	0	C	C	G	C	C	G	C	C	C	G	G	C	0	G	T	G	T	T	C	0	T	2	C	G	T	C	A	G	G	G	T	G	C	10
K102	T	C	G	G	A	T	1	C	T	A	A	A	C	A	5	C	G	G	G	C	G	G	C	C	G	G	T	4	T	G	G	A	A	A	8	A	0	T	G	T	C	G	G	G	C	T	A	C	10
K169R	T	C	A	G	A	T	1	T	T	A	A	C	A	G	5	C	C	C	C	A	G	C	C	C	A	C	T	4	T	G	G	A	A	A	8	A	0	T	G	T	C	G	G	G	C	T	A	C	10
L2010-3	T	C	G	G	A	T	1	C	T	A	A	A	C	A	5	C	G	G	G	C	G	G	C	C	G	G	T	4	T	G	G	A	A	A	8	A	0	T	G	T	C	G	G	G	C	T	A	C	10
LC955	T	C	A	G	A	T	1	T	T	A	A	C	A	G	5	C	C	C	C	A	G	C	C	C	A	G	T	4	T	G	A	A	A	A	8	T	2	T	G	A	C	A	G	G	C	T	A	C	10
LIAO3053	T	C	G	G	A	T	1	C	T	A	A	C	A	G	5	C	C	C	C	A	G	C	C	C	G	G	T	4	T	G	G	A	A	A	8	A	0	T	G	T	C	G	G	G	C	T	A	C	10
LIAO5144	T	C	G	G	A	T	1	C	T	A	A	A	C	A	5	C	G	G	G	C	G	G	C	C	A	C	C	4	T	G	A	A	A	A	8	T	2	T	C	A	G	G	A	T	G	C	?	A	0
LIN-1	T	C	A	G	A	T	1	C	T	C	C	C	A	G	5	C	C	C	C	A	G	C	C	C	G	G	C	0	G	T	G	T	T	C	0	T	2	C	G	T	C	A	G	G	G	T	G	C	10
LJ-2	T	C	G	G	A	T	1	C	T	A	A	A	C	A	5	C	G	G	G	C	G	G	C	C	A	C	C	4	T	G	A	A	A	A	8	T	2	T	C	A	G	G	A	T	G	C	?	A	0
LM-6	T	C	A	G	A	T	1	T	T	A	A	C	A	G	5	C	C	C	C	A	G	C	C	C	G	G	T	4	T	G	G	A	A	A	8	A	0	T	G	T	C	G	G	G	C	T	A	C	10
LS-22	C	T	A	C	G	C	0	C	G	A	-	C	C	A	5	G	C	G	C	C	A	G	C	C	G	G	T	4	T	G	G	A	A	A	8	A	0	T	G	T	C	G	G	G	C	T	A	C	10
LSC127	T	T	A	G	A	T	1	T	T	A	A	C	A	G	5	C	C	C	C	A	G	C	C	C	G	G	T	4	T	G	G	A	A	A	8	A	0	T	G	T	C	G	G	G	C	T	A	C	10
LX312	T	T	A	G	A	T	1	T	T	A	A	C	A	G	5	C	C	C	C	A	G	C	C	C	G	G	T	4	T	G	G	A	A	A	8	A	0	T	G	T	C	G	G	G	C	T	A	C	10
LYC-1	T	C	A	G	A	T	1	C	T	A	A	C	C	A	5	G	C	G	G	C	G	G	G	T	A	G	T	4	T	G	G	A	A	A	8	A	0	T	G	T	C	G	G	G	C	T	A	C	10
LZM004	T	T	A	G	A	T	1	C	T	A	A	A	C	A	5	C	G	G	G	C	G	G	C	C	G	G	T	4	T	G	G	A	A	A	8	A	0	T	G	T	C	G	G	G	C	T	A	C	10
LZM05-1-1	T	C	G	G	A	T	1	C	T	A	A	A	C	A	5	C	G	G	G	C	G	G	C	C	G	G	T	4	T	G	A	A	A	A	8	T	2	T	G	A	C	A	G	G	C	T	A	C	10
M3-0	T	C	A	G	A	T	1	T	T	A	A	C	A	G	5	C	C	C	C	A	G	C	C	C	G	G	T	4	T	G	G	A	A	A	8	A	0	T	G	T	C	G	G	G	C	T	A	C	10
MH9	T	C	A	G	A	T	1	C	T	C	C	C	C	A	0	C	C	G	C	C	G	C	G	C	A	C	C	4	T	G	A	A	A	A	8	T	2	T	C	A	G	G	A	T	G	C	?	A	0
MIAN715	T	C	A	G	A	T	1	C	T	A	A	C	C	A	5	G	C	G	G	C	G	G	G	T	A	G	C	0	G	T	G	T	T	C	0	T	2	C	G	T	C	A	G	G	G	T	G	C	10
N54-3	T	C	G	G	A	T	1	C	T	A	A	A	C	A	5	C	G	G	G	C	G	G	C	C	A	C	C	4	T	G	A	A	A	A	8	T	2	T	C	A	G	G	A	T	G	C	?	A	0
NAN21-3	T	C	A	G	A	T	1	C	T	C	C	C	A	G	5	C	C	C	C	A	G	C	C	C	G	G	C	0	G	T	G	T	T	C	0	T	2	C	G	T	C	A	G	G	G	T	G	C	10
NAN381	T	C	G	G	A	T	1	C	T	A	A	A	C	A	5	C	G	G	G	C	G	G	C	C	A	C	C	4	T	G	A	A	A	A	8	T	2	T	C	A	G	G	A	T	G	C	?	A	0
NAN637	T	C	A	G	A	T	0	C	G	A	A	C	C	A	5	G	C	G	C	C	A	G	C	C	G	G	T	4	T	G	G	A	A	A	8	A	0	T	G	T	C	G	G	G	C	T	A	C	10
PH4CV	T	T	A	G	A	T	1	T	T	A	A	C	A	G	5	C	C	C	C	A	G	C	C	C	G	G	T	4	T	G	G	A	A	A	8	A	0	T	G	T	C	G	G	G	C	T	A	C	10
PH6WC	T	T	A	G	A	T	1	T	T	A	A	C	A	G	5	C	C	C	C	A	G	C	C	C	G	G	T	4	T	G	G	A	A	A	8	A	0	T	G	T	C	G	G	G	C	T	A	C	10
PHW65	T	C	A	G	A	T	1	T	T	C	A	C	A	G	5	C	C	C	C	A	G	C	C	C	G	G	T	4	T	G	G	A	A	A	8	A	0	T	G	T	C	G	G	G	C	T	A	C	10
PI43W	T	T	A	G	A	T	1	T	T	A	A	C	A	G	5	C	C	C	C	A	G	C	C	C	G	G	T	4	T	G	G	A	A	A	8	A	0	T	G	T	C	G	G	G	C	T	A	C	10
QBII-1	C	T	A	C	G	C	0	C	G	A	-	C	C	A	5	G	C	G	C	C	A	G	C	C	G	G	T	4	T	G	A	A	A	A	8	A	0	T	G	T	C	G	G	G	C	T	A	C	10
QI533	T	C	A	G	A	T	1	T	T	A	A	C	A	G	5	C	C	C	C	A	G	C	C	C	A	C	T	4	T	G	G	A	A	A	8	A	0	T	G	T	C	G	G	G	C	T	A	C	10
S5003	T	C	A	G	A	T	1	C	T	A	A	C	C	A	5	G	C	G	G	C	G	G	G	T	A	G	T	4	T	G	G	A	A	A	8	A	0	T	G	T	C	G	G	G	C	T	A	C	10
S7913	T	T	A	G	A	T	1	C	T	A	A	C	A	G	5	G	C	G	C	C	A	G	C	C	G	G	T	4	T	G	A	A	A	A	8	A	0	T	G	T	C	G	G	G	C	T	A	C	10
SCML1950	T	C	A	G	A	T	1	C	T	C	C	C	A	G	5	C	C	C	C	A	G	C	C	C	G	G	C	0	G	T	G	T	T	C	0	T	2	C	G	T	C	A	G	G	G	T	G	C	10
SHEN135	T	C	G	G	A	T	1	T	T	A	A	C	A	G	5	C	C	C	C	A	G	C	C	C	G	G	T	4	T	G	G	A	A	A	8	A	0	T	G	T	C	G	G	G	C	T	A	C	10
SHEN136	T	C	G	G	A	T	1	T	T	A	A	C	A	G	5	C	C	C	C	A	G	C	C	C	G	G	T	4	T	G	G	A	A	A	8	A	0	T	G	T	C	G	G	G	C	T	A	C	10
SW01D1031-14	C	T	A	C	G	C	0	C	G	A	-	C	C	A	5	C	C	C	C	A	G	C	C	C	G	G	T	4	T	G	G	A	A	A	8	A	0	T	G	T	C	G	A	T	G	C	?	A	0
SW01D1031-17	T	T	A	G	A	T	1	C	T	A	A	C	A	G	5	C	C	C	C	A	G	C	C	C	G	G	T	4	T	G	G	A	A	A	8	A	0	T	G	T	C	G	G	G	C	T	A	C	10
T32	T	C	G	G	A	T	1	T	T	A	A	C	A	G	5	C	C	C	C	A	G	C	C	C	G	G	T	4	T	G	G	A	A	A	8	A	0	T	G	T	C	G	G	G	C	T	A	C	10
TD1	T	C	A	G	A	T	1	C	T	C	C	C	A	G	5	C	C	C	C	A	G	C	C	C	G	G	C	0	G	T	G	T	T	C	0	T	2	C	G	T	C	A	G	G	G	T	G	C	10
TL96B	T	C	A	G	A	T	1	T	T	A	A	C	A	G	5	C	C	C	C	A	G	C	C	C	G	G	T	4	T	G	G	A	A	A	8	A	0	T	G	T	C	G	G	G	C	T	A	C	10
W031-1	T	C	A	G	A	T	1	T	T	A	A	C	A	G	5	C	C	C	C	A	G	C	C	C	G	G	T	4	T	G	G	A	A	A	8	A	0	T	G	T	C	G	G	G	C	T	A	C	10
W284	T	C	G	G	A	T	1	T	T	A	A	C	A	G	5	C	C	C	C	A	G	C	C	C	G	G	T	4	T	G	G	A	A	A	8	A	0	T	G	T	C	G	G	G	C	T	A	C	10
W30	T	C	A	G	A	T	1	T	T	A	A	C	A	G	5	C	C	C	C	A	G	C	C	C	A	C	T	4	T	G	G	A	A	A	8	A	0	T	G	T	C	G	G	G	C	T	A	C	10
W8071	T	C	A	G	A	T	1	C	T	C	C	C	A	G	5	C	C	C	C	A	G	C	C	C	G	G	C	0	G	T	G	T	T	C	0	T	2	C	G	T	C	A	G	G	G	T	G	C	10
W8199	C	T	A	C	G	C	0	C	G	A	-	C	C	A	5	G	C	G	C	C	A	G	C	C	G	G	C	0	G	T	G	T	T	C	0	T	2	C	G	T	C	A	G	G	G	T	A	C	10
WZ-1	T	T	A	G	A	T	1	C	T	A	A	A	C	A	5	C	G	G	G	C	G	G	C	C	G	G	T	4	T	G	G	A	A	A	8	A	0	T	G	T	C	G	G	G	C	T	A	C	10
XBY2193	T	C	A	G	A	T	1	C	T	A	A	C	C	A	5	G	C	G	G	C	G	G	G	T	A	G	T	4	T	G	G	A	A	A	8	A	0	T	G	T	C	G	G	G	C	T	A	C	10
XH05	C	T	A	C	G	C	1	C	-	C	C	C	A	G	5	C	C	G	C	C	G	G	C	C	G	G	T	4	T	G	G	A	A	A	8	A	0	T	G	T	C	G	G	G	C	T	A	C	10
YA8201	T	C	G	G	A	T	1	C	T	A	A	A	C	A	5	C	G	G	G	C	G	G	C	C	G	G	T	4	T	G	G	A	A	A	8	A	0	T	G	T	C	G	G	G	C	T	A	C	10
YI99	T	C	G	G	A	T	1	C	T	A	A	C	A	G	5	C	C	C	C	A	G	C	C	C	G	G	T	4	T	G	G	A	A	A	8	A	0	T	G	T	C	G	G	G	C	T	A	C	10
ZHENG99	T	C	A	G	A	T	1	T	T	A	A	C	A	G	5	C	C	C	C	A	G	C	C	C	G	G	T	4	T	G	G	A	A	A	8	A	0	T	G	T	C	G	G	G	C	T	A	C	10
ZJ-3	T	C	A	G	A	T	1	T	T	A	A	C	A	G	5	C	C	C	C	A	G	C	C	C	G	G	T	4	T	G	G	A	A	A	8	A	0	T	G	T	C	G	G	G	C	T	A	C	10
[truncated: 114 more columns]
