# Supplementary material for: Genome-wide identification of ZmHMAs and association of natural variation in ZmHMA2 and ZmHMA3 with leaf cadmium accumulation in maize
Source: PeerJ. 2019 Oct 23;7:e7877. doi: 10.7717/peerj.7877 (PMC6815194; doi:10.7717/peerj.7877)
Supplement: Table S8 [file peerj-07-7877-s008.xlsx]

## Sheet: Table S8
Table S8 | Prediction analysis of subcellular localization in ZmHMA2 and ZmHMA3 protein using ProtComp
Protein	Location	LocDB	PotLocDB	Neural Nets	Pentamers	Integral
ZmHMA2	Nuclear	0	0	0	0	0
	Plasma membrane	10	3	0.89	0.75	9.65
	Extracellular	0	0	0.89	1.21	0.01
	Cytoplasmic	0	0	0	1.1	0
	Mitochondrial	0	0	0	1.51	0.1
	Endoplasm. retic.	0	0	0	0.83	0
	Peroxisomal	0	0	0.89	0	0.07
	Golgi	0	0	0.34	0.25	0
	Chloroplast	0	0	0	0.07	0.18
	Vacuolar	0	0	0	0	0
ZmHMA3	Nuclear	0	0	0	0	0
	Plasma membrane	10	3	0.88	0	9.26
	Extracellular	0	0	0.88	2.26	0.09
	Cytoplasmic	0	0	0	0.59	0
	Mitochondrial	0	0	0	2.42	0.19
	Endoplasm. retic.	0	0	0	0.35	0
	Peroxisomal	0	0	0.88	0	0.04
	Golgi	0	0	0.37	0.08	0
	Chloroplast	0	0	0	0.23	0.41
	Vacuolar	0	0	0	0	0
LocDB: scores based on query protein's homologies with proteins of known localization. PotLocDB: scores based on homologies with proteins which locations are not experimentally known but are assumed from strong theoretical evidence. Neural Nets: scores assigned by neural networks. Pentamers: scores based on comparisons of pentamer distributions calculated for QUERY and DB sequences. Integral: fin…
